# Supplementary material for: The International Polycap Study-3 (TIPS-3): Design, baseline characteristics and challenges in conduct
Source: PubMed Central journal article supplement (PMC6299262; doi:10.1016/j.ahj.2018.07.012), 2018-12
Supplement: mmc1.pdf [file mmc1.pdf]

**Supplementary Appendix: The International Polycap Study (TIPS-3): design, baseline characteristics and challenges in conduct**

**Sample size and study power calculations to determine the effect of the Polycap compared to placebo:**

Originally, the trial was planned to randomize 5000 study participants and follow them for a mean of 5 years, which would have >80% power for a 35% reduction, >90% power for a 40% reduction in composite CV events at 5 years (supplemental table 1). The sample size calculation was based on an estimated yearly event rate of 1% for major CVD events in the placebo group; non-adherence rates in the intervention arm of 8% in the first year, an additional 3% in the second year, and an additional 2% per year for subsequent years for each active therapy (17% at 5 years); drop-in rates of 2% per year (10% over 5 year; and rates of lost to follow-up of < 2 % at 5 years. We have set the two-sided alpha at 0.05.

**SUPPLEMENTARY TABLE 1: ORIGINAL SAMPLE SIZE CALCULATIONS ASSUMING TWO YEARS OF RECRUITMENT, PLUS FOUR YEARS OF FOLLOW-UP (MEAN FOLLOW-UP OF 5 YEARS) WITH AN 18% DROPOUT RATE, AND A 10% DROP IN RATE.**

| Risk Reduction (%) | Control Event Rate (CV death, MI, stroke, heart failure, revascularization, resuscitated cardiac arrest) | Power (%) |      |
|--------------------|----------------------------------------------------------------------------------------------------------|-----------|------|
|                    |                                                                                                          | 80        | 90   |
| 35                 | 1.0%/year                                                                                                | 4224      | 5654 |
| 40                 | 1.0%/year                                                                                                | 3132      | 4194 |
| 50                 | 1.0%/year                                                                                                | 1876      | 2512 |

The trial has enrolled 5713 participants, and assumptions were revised based on the trial experiences to date. The following modifications were made to estimate study power: a total trial period of approximately 8 years, control event rate of 1.2% to 1.3% per year (assuming a treatment effect exists with an overall event rate of 1.1% observed so far), drop-out rate of 29% at 8 years, drop in rate of 8% at 8 years (instead of 17% and 10% respectively), and loss to follow up of 2% at 8 years. Based on these modifications, the study will still have >80% power for a 35% reduction, >90% power for a 40% reduction in composite CV events (supplemental table 2).

**SUPPLEMENTARY TABLE 2: REVISED SAMPLE SIZE CALCULATIONS BASED ON TRIAL PERFORMANCE AT THE END OF THE ENROLLMENT PHASE:**

| <b>Risk Reduction (%)</b> | <b>Control Event Rate (CV death, MI, stroke, heart failure, revascularization, resuscitated cardiac arrest)</b> | <b>Power (%)</b> |
|---------------------------|-----------------------------------------------------------------------------------------------------------------|------------------|
| 35                        | 1.2%/year                                                                                                       | 83.7             |
|                           | 1.3%/year                                                                                                       | 86.6             |
| 40                        | 1.2%/year                                                                                                       | 92.5             |
|                           | 1.3%/year                                                                                                       | 94.4             |

**Statistical considerations for interim analyses:**

An independent Data Safety and Monitoring Board (DSMB) will review all data on safety and efficacy at regular intervals (every 6 months). Three formal interim analyses are planned, equally spaced with respect to accumulating number of events. If the interim analyses show clear benefit, the DSMB may recommend early trial termination. A conservative stopping rule approach will be recommended and will be formalized in conjunction with the DSMB at their first meeting. A suggested guideline for early termination for efficacy is a reduction of 4 standard deviations (corresponding to a p value of 0.00006) in the primary outcomes at the first and second looks, or

3 standard deviations (corresponding to a p value of 0.0027) at the third look. Conversely, a 3 standard deviation excess in the primary study outcomes with treatment at the first two looks and 2 standard deviations excess at the third look would be considered evidence for harm. The monitoring boundaries should remain crossed at 2 successive analyses at least 3 months apart to ensure that temporary variations in the effect sizes do not lead to early termination. Given these extremely conservative monitoring boundaries and the limited number of formal interim analyses, the type I error rate adjustment for the final analysis will be negligible ( $<0.00001$ ). If the study is discontinued for one component, the trial will continue evaluating the other components.

**TIPS-3 Steering Committee Members:**

| <b>Name</b>                                                  | <b>Country</b> |
|--------------------------------------------------------------|----------------|
| Bosch, Jackie                                                | Canada         |
| Dans, Antonio                                                | Philippines    |
| Gamra, Habib                                                 | Tunisia        |
| Gogia, Mona****                                              | India          |
| Maseeh, Arun (left steering committee during the study) **** | India          |
| Joseph, Philip                                               | Canada         |
| Lopez-Jaramillo, Patricio                                    | Colombia       |
| Mukherjee, Shirshendu***                                     | India          |
| Seabrook, Richard***                                         | United Kingdom |
| Tay, Diana***                                                | United Kingdom |
| Pais, Prem**                                                 | India          |
| Santoso, Anwar                                               | Indonesia      |
| Talukder, Shamim                                             | Bangladesh     |
| Teo, Koon**                                                  | Canada         |
| Xavier, Denis                                                | India          |
| Yeates, Karen                                                | Tanzania       |
| Yusoff, Khalid                                               | Malaysia       |
| Yusuf, Salim*                                                | Canada         |

\*Principal Investigator, \*\*Co-principal Investigator, \*\*\*Wellcome Trust, \*\*\*\*Cadila Pharmaceuticals.

**TIPS-3 Site Principal and Co-Investigators:**

| <b>Country</b> | <b>Name</b>                   | <b>Center</b>                                     | <b>Role</b> |
|----------------|-------------------------------|---------------------------------------------------|-------------|
| Bangladesh     | Shamim Hayder Talukder        | Eminence (401-409)                                | PI          |
| Bangladesh     | Shahin Akter                  | Eminence (401-405)                                | Co-PI       |
| Bangladesh     | Rubel Rahman Babu             | Eminence (406)                                    | Co-PI       |
| Bangladesh     | MD Rasheduzzaman              | Eminence (407)                                    | Co-PI       |
| Bangladesh     | Moushmy Popy                  | Eminence (408)                                    | Co-PI       |
| Bangladesh     | Tabassum Tamanna              | Eminence (409)                                    | Co-PI       |
| Canada         | Carolyn Taylor                | St. Paul's Hospital                               | PI          |
| Canada         | Scott Lear                    | St. Paul's Hospital                               | Co-PI       |
| Canada         | Eva Lonn                      | Hamilton General Hospital                         | PI          |
| Canada         | Gilles Dagenais               | Institut Universitaire De Cardiologist            | PI          |
| Canada         | Paul Poirier                  | Institut Universitaire De Cardiologist            | Co-PI       |
| Canada         | Pravinsagar Mehta             | Dr. Pravinsagar Mehta - Laxmi Centre              | PI          |
| Canada         | Preston Zuliani               | Dr. Preston Zuliani                               | PI          |
| Canada         | Michael Walsh                 | St. Joseph's Healthcare                           | PI          |
| Canada         | Nader Khalidi                 | St. Joseph's Healthcare                           | Co-PI       |
| Colombia       | Paul Anthony Camacho Lopez    | FOSCAL                                            | PI          |
| Colombia       | Gustavo Adolfo Parra          | FOSCAL                                            | Co-PI       |
| Colombia       | Andres Alirio Serrano Barco   | FOSCAL                                            | Co-PI       |
| Colombia       | Leonardo Fabio Forero-Naranjo | FOSCAL                                            | Co-PI       |
| Colombia       | Jose Accini                   | Centro Científico Asistencial                     | PI          |
| Colombia       | Melissa Accini Valencia       | Centro Científico Asistencial                     | Co-PI       |
| Colombia       | Gregorio Sanchez              | Fundacion Cardiomed, Universidad del Quindio      | PI          |
| Colombia       | Juan Pablo Yepez              | Fundacion Cardiomed, Universidad del Quindio      | Co-PI       |
| Colombia       | Dora Ines Molina de Salazar   | IPS Internistas de Caldas, Universidad de Caldas  | PI          |
| Colombia       | Luisa Jhoanna Suarez Correa   | IPS Internistas de Caldas, Universidad de Caldas  | Co-PI       |
| Colombia       | German Carmilo Galdo Gonzalez | IPS Internistas de Caldas, Universidad de Caldas  | Co-PI       |
| Colombia       | Carlos Eduardo Rivera Molano  | IPS Internistas de Caldas, Universidad de Caldas  | Co-PI       |
| Colombia       | Catalina Lopez Ceballos       | Centro de Investigacion Clinica CARDIOMED-Pereira | Co-PI       |

| Country  | Name                  | Center                                               | Role  |
|----------|-----------------------|------------------------------------------------------|-------|
| Colombia | Luis Garcia           | Centro de Investigacion Clinica<br>CARDIOMED-Pereira | PI    |
| Colombia | Carlos Montoya        | Centro de Investigacion Clinica<br>CARDIOMED-Pereira | Co-PI |
| India    | Hitesh Patel          | Saviour Multispeciality Hospital                     | PI    |
| India    | Bhavik Prajapati      | Saviour Multispeciality Hospital                     | Co-PI |
| India    | Ganapathi Bantwal     | St. John's Medical College                           | PI    |
| India    | Vageesh Ayyar         | St. John's Medical College                           | Co-PI |
| India    | Belinda George        | St. John's Medical College                           | Co-PI |
| India    | Mahmood Saba Fatima   | St. John's Medical College                           | Co-PI |
| India    | Mathew Vivek          | St. John's Medical College                           | Co-PI |
| India    | Sindhu Joshi          | Mahavir Hospital & Research Centre                   | PI    |
| India    | D Krishnamurthy       | Mahavir Hospital & Research Centre                   | Co-PI |
| India    | Viswanathan Mohan     | Madras Diabetes Research Foundation                  | PI    |
| India    | Kasthuri Selvam       | Madras Diabetes Research Foundation                  | Co-PI |
| India    | BK Gupta              | S.P. Medical College & A.G. Hospitals                | PI    |
| India    | DK Agarwal            | S.P. Medical College & A.G. Hospitals                | Co-PI |
| India    | BL Ranka              | S.P. Medical College & A.G. Hospitals                | Co-PI |
| India    | Jigyasa Gupta         | S.P. Medical College & A.G. Hospitals                | Co-PI |
| India    | Mukesh Kumar Sarna    | Fortis Escorts Hospital                              | PI    |
| India    | Rajeev Gupta          | Fortis Escorts Hospital                              | Co-PI |
| India    | Sandeep Kumar Gupta   | M.V. Hospital and Research Centre                    | PI    |
| India    | Danesh Chandra Pandey | M.V. Hospital and Research Centre                    | Co-PI |
| India    | Ashok Kumar Mishra    | M.V. Hospital and Research Centre                    | Co-PI |
| India    | Urmil Shah            | Care Institute of Medical Sciences                   | PI    |
| India    | Anish Chandarana      | Care Institute of Medical Sciences                   | Co-PI |
| India    | Parthasarthy Iyengar  | Care Institute of Medical Sciences                   | Co-PI |
| India    | Keyur Parikh          | Care Institute of Medical Sciences                   | Co-PI |
| India    | Milan Chag            | Care Institute of Medical Sciences                   | Co-PI |
| India    | Hemang Baxi           | Care Institute of Medical Sciences                   | Co-PI |
| India    | Satya Gupta           | Care Institute of Medical Sciences                   | Co-PI |
| India    | Ajay Naik             | Care Institute of Medical Sciences                   | Co-PI |
| India    | Jyoti Bhatia          | Care Institute of Medical Sciences                   | Co-PI |
| India    | Guarav Chhaya         | Sanjivani Superspeciality Hospital                   | PI    |
| India    | Vinay Bhomia          | Sanjivani Superspeciality Hospital                   | Co-PI |
| India    | Naveen Reddy          | Mediciti Hospitals                                   | PI    |
| India    | Sheela Thorat         | Mediciti Hospitals                                   | Co-PI |
| India    | Kamlesh Fatania       | Rathi Hospital                                       | PI    |
| India    | Gaurav Rathi          | Rathi Hospital                                       | Co-PI |

| Country | Name                              | Center                                   | Role  |
|---------|-----------------------------------|------------------------------------------|-------|
| India   | Muthu Ramu                        | Dr. Mohan's Diabetes Specialities centre | PI    |
| India   | Selvakumar Jeyavel                | Dr. Mohan's Diabetes Specialities centre | Co-PI |
| India   | Sudhir Kumar Bhatnagar            | Abhinav Hospital                         | PI    |
| India   | Anil Jawahjrani                   | Abhinav Hospital                         | Co-PI |
| India   | Neeta Deshpande                   | Belgaum Diabetes Centre                  | PI    |
| India   | Aman Syed                         | Belgaum Diabetes Centre                  | Co-PI |
| India   | Kamal Sharma                      | Dr. Kamal Sharma Cardiologist Clinic     | PI    |
| India   | Neha Sharma                       | Dr. Kamal Sharma Cardiologist Clinic     | Co-PI |
| India   | Ketan Mehta                       | Health Harmony                           | PI    |
| India   | Arvind Ghongane                   | Health Harmony                           | Co-PI |
| India   | Devavrat Shahasane                | Health Harmony                           | Co-PI |
| India   | Bandari Srinivasulu               | Aditya Nursing Home                      | PI    |
| India   | Byalla Janaki Srinivas            | Aditya Nursing Home                      | Co-PI |
| India   | Bosco Balraj                      | Trichy Diabetes Centre                   | PI    |
| India   | Balamurugan Mallingar             | Trichy Diabetes Centre                   | Co-PI |
| India   | Ravindranath Venkatesan           | Trichy Diabetes Centre                   | Co-PI |
| India   | J Narendra                        | Nanjappa Life Care                       | PI    |
| India   | B.H. Lokesh                       | Nanjappa Life Care                       | Co-PI |
| India   | Yerrathota Balaji                 | Sree Balaji Nursing Home                 | PI    |
| India   | Yerrathota Bhavishya              | Sree Balaji Nursing Home                 | Co-PI |
| India   | Damodara Rao Kodem                | Queen's NRI Hospital                     | PI    |
| India   | Venkata Venu Gopal Anumanchipalli | Queen's NRI Hospital                     | Co-PI |
| India   | Bhaskara Rao Malipeddi            | Queen's NRI Hospital                     | Co-PI |
| India   | Rajeev Gupta                      | Eternal Heart Care Centre                | PI    |
| India   | Raghubir Singh Khedar             | Eternal Heart Care Centre                | Co-PI |
| India   | Jugal Bihari Gupta                | Eternal Heart Care Centre                | Co-PI |
| India   | Geeti Arora                       | Deep Heart Centre                        | PI    |
| India   | Rakesh Aggarwal                   | Deep Heart Centre                        | Co-PI |
| India   | Abraham Oomman                    | Ramana Maharishi Rangammal Hospital      | PI    |
| India   | Fazel Mohammed Saleem             | Ramana Maharishi Rangammal Hospital      | Co-PI |
| India   | Kannan Balamurali                 | Ramana Maharishi Rangammal Hospital      | Co-PI |
| India   | Sudha Vidyasagar                  | Manipal Centre for Clinical Research     | PI    |
| India   | Muralidhar Varma                  | Manipal Centre for Clinical Research     | Co-PI |
| India   | Kavitha Saravu                    | Manipal Centre for Clinical Research     | Co-PI |
| India   | K.M. Srinath                      | JSS Medical College Hospital             | PI    |

| <b>Country</b> | <b>Name</b>                     | <b>Center</b>                           | <b>Role</b> |
|----------------|---------------------------------|-----------------------------------------|-------------|
| India          | B. Madhu                        | JSS Medical College Hospital            | Co-PI       |
| India          | Vellala Elumalai<br>Dhandapani  | SRM Medical College                     | PI          |
| India          | Melvin George                   | SRM Medical College                     | Co-PI       |
| India          | Subramaniyan<br>Kumarasamy      | SRM Medical College                     | Co-PI       |
| India          | Shrikant Kulkarni               | Noble Hospital                          | PI          |
| India          | Namdev Jagtap                   | Noble Hospital                          | Co-PI       |
| India          | Mukund Penurkar                 | Sanjeevan Hospital                      | PI          |
| India          | P.T. Chandrahas                 | Saptagiri Institute of Medical Sciences | PI          |
| India          | Apurva Patel                    | SAL Hospital                            | PI          |
| India          | Anil Jain                       | SAL Hospital                            | Co-PI       |
| India          | Nirmal Parmar                   | SAL Hospital                            | Co-PI       |
| India          | Dushyant Balat                  | Apollo Hospitals International Limited  | PI          |
| India          | Sameer Dani                     | Apollo Hospitals International Limited  | Co-PI       |
| India          | Piyush Desai                    | Nirmal Hospital Pvt. Ltd.               | PI          |
| India          | Mehul Bhavsar                   | Nirmal Hospital Pvt. Ltd.               | Co-PI       |
| India          | Vikrant Vijan                   | Vijan Cardiac & Critical Care Centre    | PI          |
| India          | Ganesh Wadgoankar               | Vijan Cardiac & Critical Care Centre    | Co-PI       |
| India          | Pravin Dinkar Supe              | Supe Heart & Diabetes Hospital          | PI          |
| India          | Anupama Pravin Supe             | Supe Heart & Diabetes Hospital          | Co-PI       |
| India          | Varade Deepak                   | Asian Institute of Medical Sciences     | PI          |
| India          | Sunder Thiruginana<br>Sambandan | Apollo Research & Innovations           | PI          |
| India          | Kannaiyan Ramamurthee           | Apollo Research & Innovations           | Co-PI       |
| India          | Abraham Dr. Oomman              | Apollo Research & Innovations           | Co-PI       |
| India          | Gursaran Sidhu                  | Sidhu Hospital                          | PI          |
| India          | Shivali Anand                   | Sidhu Hospital                          | Co-PI       |
| India          | Abhitej Sidhu                   | Sidhu Hospital                          | Co-PI       |
| India          | Vineet Shukla                   | KRM Hospital                            | PI          |
| India          | Nalini Mishra                   | KRM Hospital                            | Co-PI       |
| India          | Naveen Jamwal                   | KRM Hospital                            | Co-PI       |
| India          | Sanjeev Mohan                   | KRM Hospital                            | Co-PI       |
| India          | Sandeep Gupta                   | KRM Hospital                            | Co-PI       |
| Indonesia      | Anwar Santoso                   | Harapan Kita Hospital                   | PI          |
| Indonesia      | Ade Meidian Ambari              | Harapan Kita Hospital                   | Co-PI       |
| Indonesia      | Suko Adiarto                    | Harapan Kita Hospital                   | Co-PI       |
| Indonesia      | Basuni Radi                     | Harapan Kita Hospital                   | Co-PI       |
| Indonesia      | Bambang Widyantoro              | Harapan Kita Hospital                   | Co-PI       |



| <b>Country</b> | <b>Name</b>                        | <b>Center</b>                                        | <b>Role</b> |
|----------------|------------------------------------|------------------------------------------------------|-------------|
| Malaysia       | Khalid Yusoff                      | Universiti Teknologi Mara (UiTM) and UCSI University | PI          |
| Malaysia       | Nafiza Mat Nasir                   | Universiti Teknologi Mara (UiTM)                     | Co-PI       |
| Malaysia       | Farnaza Ariffin                    | Universiti Teknologi Mara (UiTM)                     | Co-PI       |
| Malaysia       | Khairul Shafiq Ibrahim             | Universiti Teknologi Mara (UiTM)                     | Co-PI       |
| Malaysia       | Ambigga S. Krishnapillai           | Universiti Pertahanan Malaysia (UPNM)                | Co-PI       |
| Malaysia       | NG Kien Keat                       | Universiti Pertahanan Malaysia (UPNM)                | Co-PI       |
| Malaysia       | Johan Rizwal Ismail                | Universiti Teknologi Mara (UiTM) - Kasim             | PI          |
| Malaysia       | Nicholas Chua Yul Chye             | Universiti Teknologi Mara (UiTM) - Kasim             | Co-PI       |
| Malaysia       | Raja Ezman Fardiz bin Raja Shariff | Universiti Teknologi Mara (UiTM) - Kasim             | Co-PI       |
| Malaysia       | Mohd Aznan                         | International Islamic University Malaysia            | PI          |
| Malaysia       | Fa'iza Abdullah                    | International Islamic University Malaysia            | Co-PI       |
| Malaysia       | Samsul Draman                      | International Islamic University Malaysia            | Co-PI       |
| Malaysia       | Nurjasmine Jamani                  | International Islamic University Malaysia            | Co-PI       |
| Philippines    | Homer Co                           | Philippines General Hospital                         | PI          |
| Philippines    | Lia Aileen Palileo                 | Philippines General Hospital                         | Co-PI       |
| Philippines    | Lia Aileen Palileo                 | Philippines General Hospital                         | Co-PI       |
| Philippines    | Marc Evans Abat                    | Philippines General Hospital                         | Co-PI       |
| Philippines    | Michael Joseph Agbayani            | Philippines General Hospital                         | Co-PI       |
| Philippines    | Antonio Miguel Dans                | Philippines General Hospital                         | Co-PI       |
| Philippines    | Martha Jane Pauline Umali          | Philippines General Hospital                         | Co-PI       |
| Philippines    | Aldrin Loyola                      | Philippines General Hospital                         | Co-PI       |
| Philippines    | Aldrin Loyola                      | Philippines General Hospital                         | Co-PI       |
| Philippines    | Dante Morales                      | Manila Doctors Hospital                              | PI          |
| Philippines    | Daniel Francisco Morales           | Manila Doctors Hospital                              | Co-PI       |
| Philippines    | Ronald Ian Cadiz                   | Manila Doctors Hospital                              | Co-PI       |
| Philippines    | Dennis Jose Sulit                  | Quirino Memorial Medical Center                      | PI          |
| Philippines    | Arturo Jr Patanao                  | Quirino Memorial Medical Center                      | Co-PI       |
| Philippines    | Candy Angelica Sigua Cabaddu       | Quirino Memorial Medical Center                      | Co-PI       |
| Philippines    | Gregorio Rogelio                   | St. Lukes Medical Center                             | PI          |

| <b>Country</b> | <b>Name</b>                | <b>Center</b>                           | <b>Role</b> |
|----------------|----------------------------|-----------------------------------------|-------------|
| Philippines    | Lemuell Karla Sanchez      | St. Lukes Medical Center                | Co-PI       |
| Philippines    | Nannette Rey               | De La Salle University & Medical Center | PI          |
| Philippines    | Julie Anne Villanueva      | De La Salle University & Medical Center | Co-PI       |
| Philippines    | Kenneth Miranda            | De La Salle University & Medical Center | Co-PI       |
| Philippines    | Ian Lordeo Gutierrez       | De La Salle University & Medical Center | Co-PI       |
| Philippines    | Eleanor Ponayo             | De La Salle University & Medical Center | Co-PI       |
| Philippines    | Lauren Kay Evangelista     | De La Salle University & Medical Center | Co-PI       |
| Philippines    | Miram Timonera             | Adventist Medical Centre                | PI          |
| Philippines    | Celina Jo                  | Adventist Medical Centre                | Co-PI       |
| Philippines    | Kathleen Garcia-Garingarao | Adventist Medical Centre                | Co-PI       |
| Philippines    | Carlo Garingarao           | Adventist Medical Centre                | Co-PI       |
| Philippines    | Aireen Capitan             | Adventist Medical Centre                | Co-PI       |
| Philippines    | Josefina Cruz              | Palawan Medical City                    | PI          |
| Philippines    | Armie Tabarra Cleofas      | Palawan Medical City                    | Co-PI       |
| Philippines    | Tirador Louie              | St. Paul's Hospital                     | PI          |
| Philippines    | Chariza Trompeta           | St. Paul's Hospital                     | Co-PI       |
| Philippines    | Efren Jr Estoce            | St. Paul's Hospital                     | Co-PI       |
| Philippines    | Ma Dovie Lallaine Ygpuara  | St. Paul's Hospital                     | Co-PI       |
| Philippines    | John Dennis Alcaraz        | Jabez Medical Center                    | PI          |
| Philippines    | Leah Alcaraz               | Jabez Medical Center                    | Co-PI       |
| Philippines    | Maria Teresa B Abola       | Philippine Heart Centre                 | PI          |
| Philippines    | Leahdette Padua            | Philippine Heart Centre                 | Co-PI       |
| Tanzania       | Kajiru Kilonzo             | Pamoja Tunawez Women's Centre           | PI          |
| Tanzania       | E Harry Mwerinde           | Pamoja Tunawez Women's Centre           | PI          |
| Tunisia        | Habib Gamra                | Fattouma Bourguiba University Hospital  | PI          |
| Tunisia        | Majed Hassine              | Fattouma Bourguiba University Hospital  | Co-PI       |
| Tunisia        | Mejdi Ben Messaoud         | Fattouma Bourguiba University Hospital  | Co-PI       |
| Tunisia        | Marouane Mahjoub           | Fattouma Bourguiba University Hospital  | Co-PI       |

| <b>Country</b> | <b>Name</b>         | <b>Center</b>                             | <b>Role</b> |
|----------------|---------------------|-------------------------------------------|-------------|
| Tunisia        | Ali Ben Khalfallah  | MENZEL BOURGUIBA REGIONAL HOSPITAL        | PI          |
| Tunisia        | Habib Haouala       | MILITARY HOSPITAL OF INSTRUCTION OF TUNIS | PI          |
| Tunisia        | Abdeddayem Haggui   | MILITARY HOSPITAL OF INSTRUCTION OF TUNIS | Co-PI       |
| Tunisia        | Sondes Kraiem       | Habib Thameur Hospital                    | PI          |
| Tunisia        | Fethia Ben Moussa   | Habib Thameur Hospital                    | Co-PI       |
| Tunisia        | Faouzi Maatouk      | Fattouma Bourguiba University Hospital    | PI          |
| Tunisia        | Samir Noura         | Fattouma Bourguiba University Hospital    | PI          |
| Tunisia        | Wafa Zhani          | Fattouma Bourguiba University Hospital    | Co-PI       |
| Tunisia        | Khaoula Bouaziz     | Fattouma Bourguiba University Hospital    | Co-PI       |
| Tunisia        | Asma Sriha-Belguith | Fattouma Bourguiba University Hospital    | PI          |
| Tunisia        | Hela Abroug         | Fattouma Bourguiba University Hospital    | Co-PI       |
| Tunisia        | Manel Ben Fredj     | Fattouma Bourguiba University Hospital    | Co-PI       |
